# Supplementary material
Source: PubMed Central journal article supplement (PMC4284579)
Supplement: pnas.201413935SI.pdf [file pnas.201413935SI.pdf]

# Supporting Information

Salio et al. 10.1073/pnas.1413935112

## SI Materials and Methods

**Medium and Reagents.** The complete medium (CM) used throughout was RPMI 1640 (Gibco) for dendritic cells and Iscove's modified Dulbecco's medium (Gibco) for human iNKT cells. CM was supplemented with 2 mM L-glutamine, 1% nonessential amino acids, 1% sodium pyruvate, 1% penicillin/streptomycin,  $5 \times 10^{-5}$  M2ME (beta mercaptoethanol) (all from Gibco) and serum: 10% (vol/vol) FCS (Sigma) or 5% (vol/vol) human AB serum (Sigma) for iNKT cells. Recombinant human IL-2 was produced in our laboratory as described (1).

**Lipids.**  $\alpha$ -GalCer and Gal( $\alpha$ 1 $\rightarrow$ 2)GalCer were synthesized by a strategy described previously (2–4), and their structures were confirmed by mass spectrometry. The dried lipids were dissolved at 10 mg/mL in a solution of chloroform:methanol:water (10:10:3; vol/vol/vol), followed by dilution in 150 mM NaCl, 0.5% Tween 20 (vehicle solution) at 100–200  $\mu$ g/mL stock solution (depending on solubility). The solution was heated at 80 °C for 5 min followed by sonication for 5 min in an ultrasonic water bath.

**Tetramers.** Human CD1d and  $\beta$ 2M proteins were expressed in *Escherichia coli* as inclusion bodies and refolded around  $\alpha$ -GalCer using in vitro oxidative chromatography as described (5). For the experiments shown in Fig. S2, recombinant mouse CD1d negative control tetramers (E002-2A-G) and  $\alpha$ -GalCer-loaded recombinant murine CD1d tetramers (E001-2A-G) were purchased from Proimmune.

**Probes.** A Cyto ID Autophagy Detection kit (Enzo Life Sciences) was used at 5  $\mu$ M final concentration, according to the manufacturer's instructions. MitoTracker and MitoSox (both from Molecular Probes) were used at 150 nM and 5  $\mu$ M, respectively, in complete serum-free medium for 30 min in a 37° incubator with 5% CO<sub>2</sub>. Apoptosis was measured with antibodies to Annexin V in Annexin-binding buffer (BD Pharmingen) after culturing the cells in complete medium for 4 h in a 37° incubator with 5% CO<sub>2</sub>. 6-NBDG (Molecular Probes) was resuspended in DMSO at 10 mM and used at a final concentration of 100  $\mu$ M in complete serum-free medium for 30 min in a 37° incubator with 5% CO<sub>2</sub>.

**Antibodies for Flow Cytometry.** Antibodies were purchased from eBiosciences (CD4, clone GK1.5;  $\gamma\delta$  TCR, clone GL3; Ki67, clone SolA15; CD44, clone IM7; CD3, clone 2C11; TCR $\beta$ , clone H57-597; Bcl2, clone 10C4; CD24, clone M1/69; CD45.1, clone A20; CD45.2, clone 104; IFN $\gamma$ , clone XMG1.2; IL-4, clone 11B11; V $\beta$ 8.1/b.2, clone KJ16-133; CD11c, clone N418; CD11b, clone M1/70; CD1d, clone 1B1; ICOS, clone 7E.17G9; ROR $\gamma$ t, clone B2D; T-bet, clone 4B10; Egr-2, clone erongr2) or from Biolegend (CD69, clone H1.2F3; CD8a, clone 53–6.7; PLZF, clone 9E12; CD62L, clone MEL-14; NK1.1, clone PK136; B220, clone RA3-6B2). Anti-Glut-1 antibody, clone 202915, was from R&D Systems. Samples were acquired on an LSR II analyzer, and data were processed with FlowJo 9. For analysis, all samples were sequentially gated on small lymphocytes, singlets, and live cells, after which B cells were excluded to reduce nonspecific  $\alpha$ -GalCer CD1d tetramer binding.

**RNA Extraction and qPCR.** RNA was extracted from sorted cells with RNeasy columns (Qiagen) and quantified with a Nanodrop Spectrophotometer. cDNA was synthesized from 200 ng of RNA using the High-Capacity cDNA Archive kit (Applied Biosystems). Real-time quantitative PCR was performed in duplicate on the Applied Biosystems 7500 Fast Real-Time PCR system, according to the manufacturer's instructions, and using Applied Biosystems Taqman Universal PCR Master mix and Taqman probes. Analysis of gene expression was calculated according to the  $2^{-\Delta C_t}$  method using HPRT as the housekeeping gene. HPRT and Atg7 Taqman probes were from Applied Biosystems.

To detect V $\alpha$ 14–J $\alpha$ 18 rearrangements, RNA was extracted from  $8 \times 10^6$  sorted DP thymocytes depleted of  $\alpha$ -GalCer-CD1d tetramer<sup>+</sup> cells. The sequences of the primers and Taqman probes used in this analysis have been previously published by Gapin et al. (6) and are as follows: V $\alpha$ 14—5'-TGGGAGATA-CTCAGCAACTCTGG-3'; J $\alpha$ 18—5'-CAGGTATGACAATCAGCTGAGTCC-3'; C $\alpha$  forward—5'-CCTCTGCCTGTTCCACCGACTT-3'; C $\alpha$  reverse—5'-TGGCGTTGGTCTCTTTGAAG-3'; V $\alpha$ -14 PROBE FAM—5'-FAM-CACCCTGCTGGATGACAC-TGCCAC-TAMRA-3'; and C $\alpha$ -PROBE FAM—5'-FAM-CTCCCAAATCAATGTGCCGAAAACCA-TAMRA-3'.

Analysis of gene expression was calculated according to the  $2^{-\Delta C_t}$  method using C $\alpha$  amplicons as a reference.

1. Traunecker A, Oliveri F, Karjalainen K (1991) Myeloma based expression system for production of large mammalian proteins. *Trends Biotechnol* 9(4):109–113.
2. Jervis PJ, et al. (2010) Synthesis and biological activity of alpha-glucosyl C24:0 and C20:2 ceramides. *Bioorg Med Chem Lett* 20(12):3475–3478.
3. Veerapen N, et al. (2009) Synthesis and biological activity of alpha-galactosyl ceramide KRN7000 and galactosyl (alpha1 $\rightarrow$ 2) galactosyl ceramide. *Bioorg Med Chem Lett* 19(15):4288–4291.
4. Wojno J, et al. (2012) Amide analogues of CD1d agonists modulate iNKT-cell-mediated cytokine production. *ACS Chem Biol* 7(5):847–855.
5. Karadimitris A, et al. (2001) Human CD1d-glycolipid tetramers generated by in vitro oxidative refolding chromatography. *Proc Natl Acad Sci USA* 98(6):3294–3298.
6. Hager E, Hawwari A, Matsuda JL, Krangel MS, Gapin L (2007) Multiple constraints at the level of TCRalpha rearrangement impact Valpha14i NKT cell development. *J Immunol* 179:2228–2234.

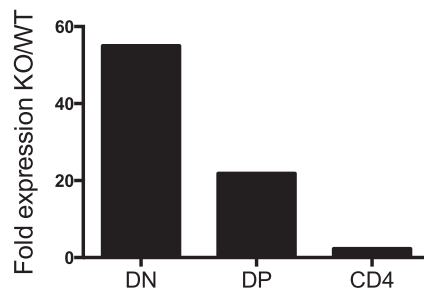

**Fig. S1.** Deletion of *Atg7* in CD4 Cre-*Atg7*<sup>-/-</sup> mice. *Atg7* expression levels as determined by qPCR in knockout mice relative to a WT counterpart for each sorted thymic population.

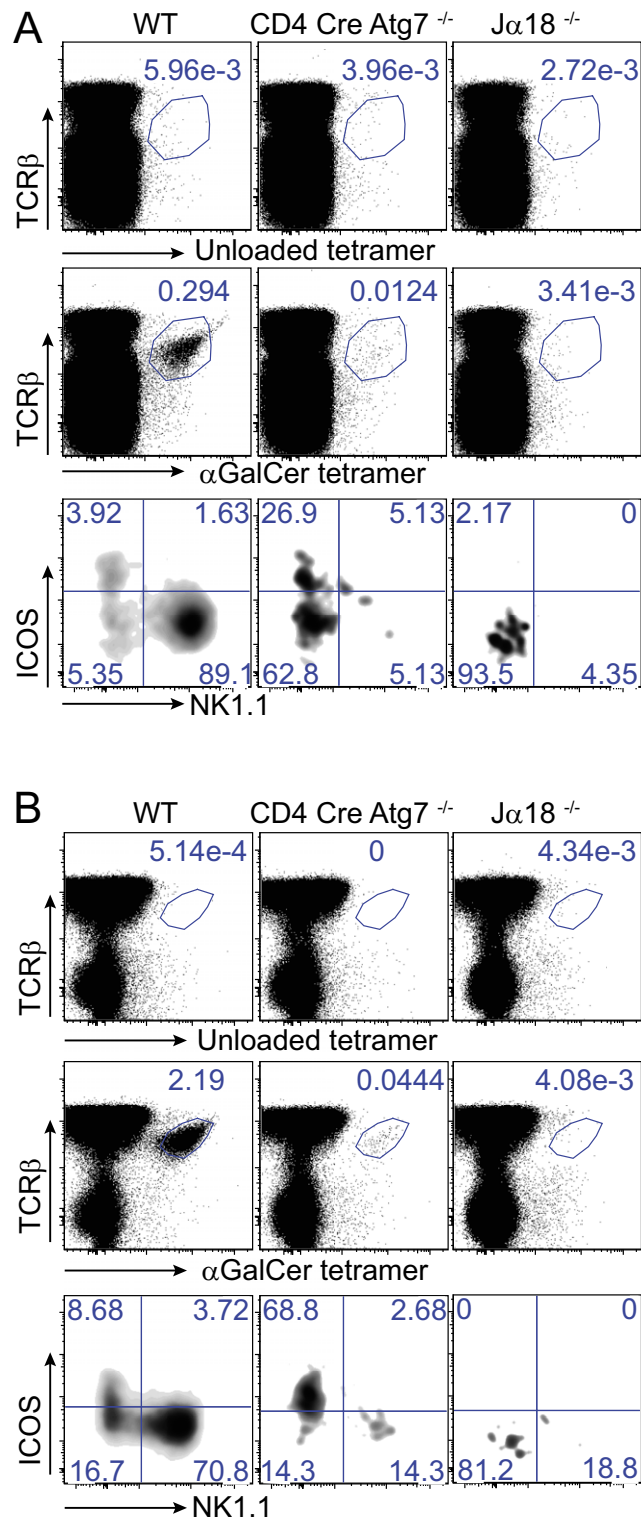

**Fig. S2.** Representative FACS dot plots depicting thymic (A) and splenic (B) iNKT cell frequencies and phenotype. For each panel, the top row represents staining with unloaded CD1d tetramers and the middle row staining with  $\alpha$ -GalCer-loaded CD1d tetramers. (Bottom) The expression of ICOS and NK1.1 on the gated iNKT cells (TCR $\beta$ <sup>+</sup>  $\alpha$ -GalCer-CD1d<sup>+</sup> cells). One representative mouse per group (one experiment representative of three with two to three mice per group).

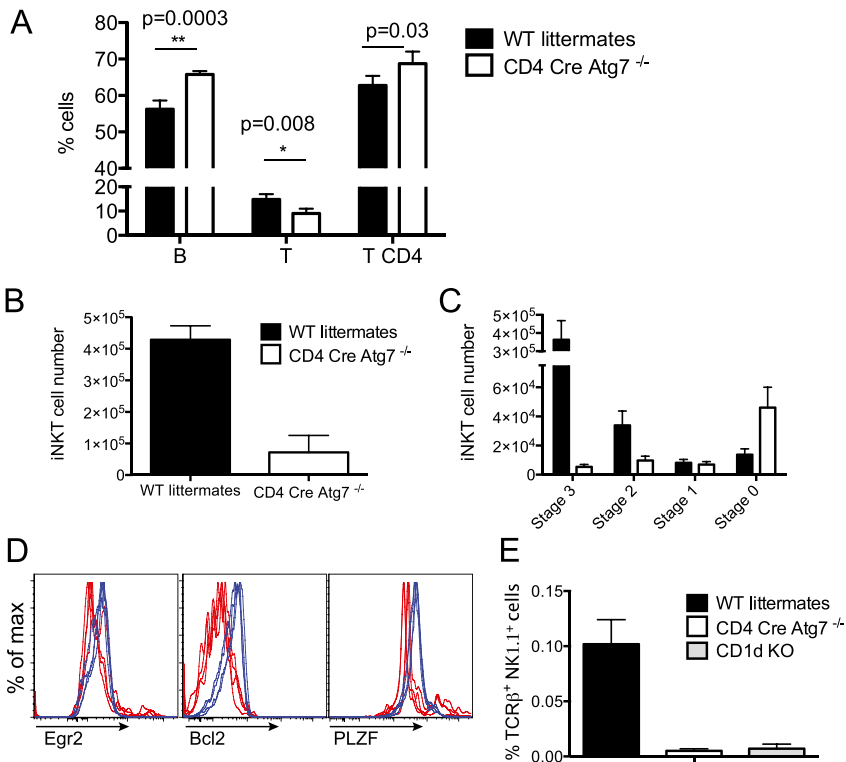

**Fig. S3.** (A) Percentages of B, T, and CD4 T cells (mean ± SD) in the spleen of WT or Cre-Atg7<sup>-/-</sup> mice. As CD4 T-cell percentages are increased, there is a mirror reduction in the percentage of CD8 T cells. *n* = 4 mice/group. (B and C) Absolute quantification of (B) total thymic iNKT cell numbers and (C) numbers at each of the maturation stages defined in Fig. 2D. Mean ± SEM; *n* = 8 WT and 6 CD4 Cre-Atg7<sup>-/-</sup> mice. (D) Intracellular expression of Egr2, Bcl2, and PLZF in gated thymic iNKT cells in WT and CD4 Cre-Atg7<sup>-/-</sup> mice. Overlays of four WT (blue) and four CD4 Cre-Atg7<sup>-/-</sup> mice (red). In CD4 Cre-Atg7<sup>-/-</sup> mice, a small population is present expressing higher PLZF, and these cells are stage 1 iNKT cells. (E) Frequencies of thymic type II iNKT cells defined as CD1d-αGalCer tetramer<sup>-</sup> TCRβ<sup>+</sup> NK1.1<sup>+</sup> cells. *n* = 8 mice/group from two independent experiments.

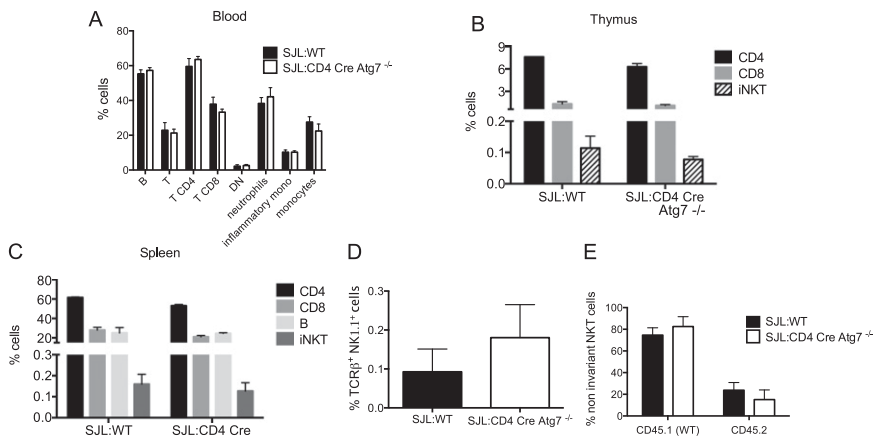

**Fig. S4.** Analysis of the reconstitution of bone marrow chimeric mice. CD45.2 BM cells from WT or CD4 Cre-Atg7<sup>-/-</sup> were mixed 1:1 with CD45.1 SJL (WT) BM cells and transplanted into lethally irradiated CD45.1 SJL WT recipients (*n* = 4/group). Nine weeks after the percentages of cells (mean ± SD) were determined in peripheral blood (A), thymus (B), and spleen (C) for control (SJL:WT) and SJL:CD4 Cre-Atg7<sup>-/-</sup> chimeras. Also shown are the percentages of noninvariant NKT cells in the two chimeras (D) and the contribution of each donor population toward their reconstitution (E).

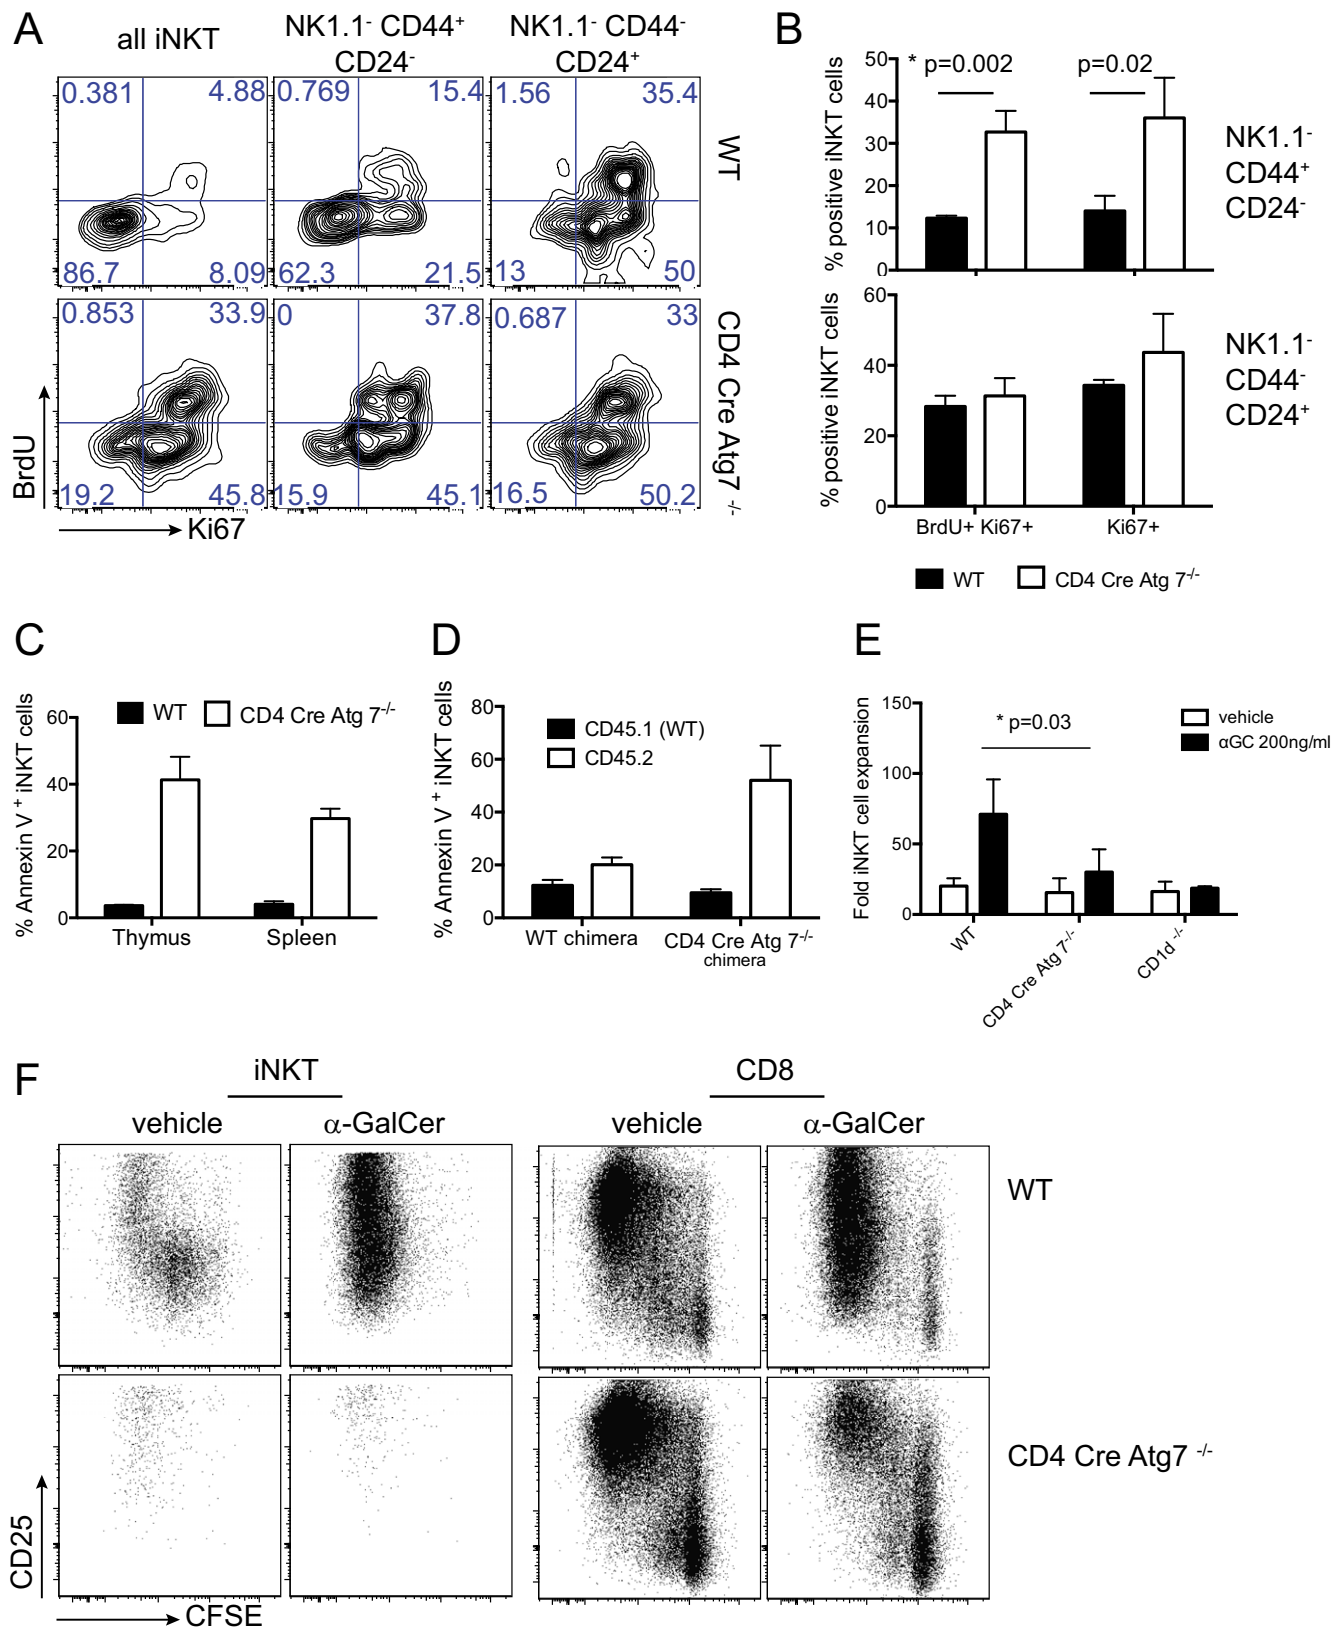

**Fig. 55.** (A and B) Enhanced BrdU incorporation in CD4 Cre-Atg7<sup>-/-</sup> iNKT cells. Thymic total iNKT cells and the NK1.1<sup>-</sup> CD44<sup>+</sup> CD24<sup>-</sup> and the NK1.1<sup>-</sup> CD44<sup>-</sup> CD24<sup>+</sup> subsets were analyzed for BrdU incorporation and Ki-67 expression 24 h after injection of 2 mg BrdU. (A) Representative FACS plots. All dot plots show gated α-GalCer-CD1d tetramer<sup>+</sup> TCR-β<sup>+</sup> iNKT cells. (Left) All iNKT cells. (Center) NK1.1<sup>-</sup> CD44<sup>+</sup> CD24<sup>-</sup> subset. (Right) NK1.1<sup>-</sup> CD44<sup>-</sup> CD24<sup>+</sup> subset. (B) Cumulative data for the NK1.1<sup>-</sup> CD44<sup>+</sup> CD24<sup>-</sup> (Top) and NK1.1<sup>-</sup> CD44<sup>-</sup> CD24<sup>+</sup> (Bottom) iNKT cell subsets. One representative experiment of two; n = 3. (C and D) Autophagy-deficient T cells are more susceptible to apoptosis. Thymocytes (C and D) and splenocytes (C) of WT and CD4 Cre-Atg7<sup>-/-</sup> mice (C) or control (SJL:WT) (D) were analyzed for Annexin V incorporation. (E) α-GalCer-induced expansion of iNKT cells is reduced in CD4 Cre-Atg7<sup>-/-</sup> mice. WT, CD4 Cre-Atg7<sup>-/-</sup>, and CD1d<sup>-/-</sup> mice were treated with vehicle or α-GalCer (200 ng/ml) for 7 d. (F) CD4 Cre-Atg7<sup>-/-</sup> mice are more susceptible to apoptosis. WT and CD4 Cre-Atg7<sup>-/-</sup> mice were treated with vehicle or α-GalCer (200 ng/ml) for 7 d. CFSE analysis of iNKT and CD8 cells. CD25 and CFSE expression were analyzed by flow cytometry. Legend continued on following page



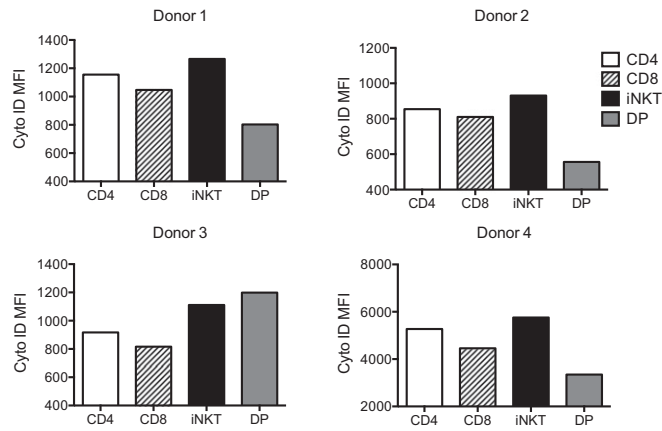

**Fig. 58.** MFI values for Cyto ID staining of the four human thymuses described in Fig. 8.

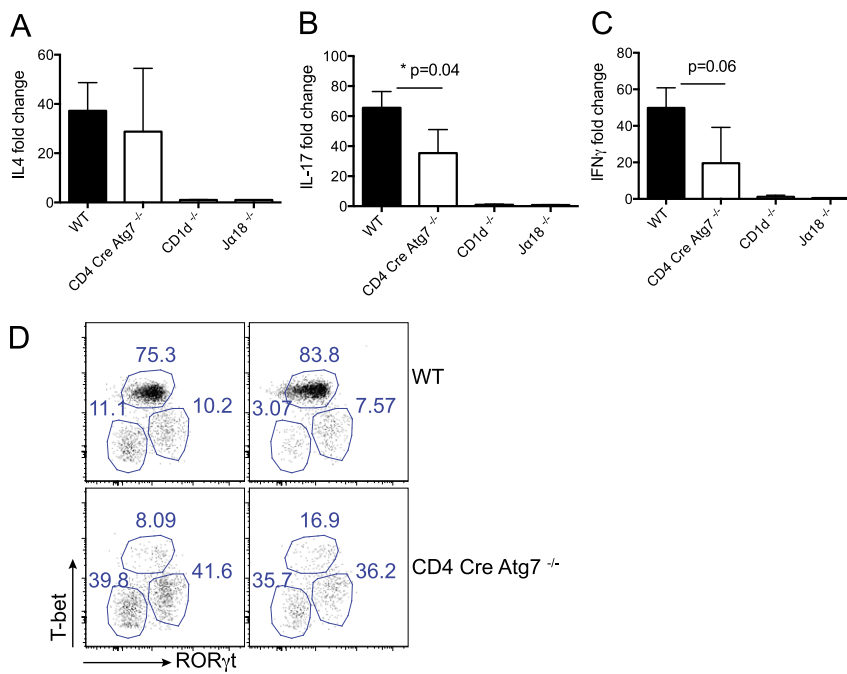

**Fig. 59.** Impairment of NKT-1 and NKT-17 iNKT cell subsets in CD4 Cre-Atg7<sup>-/-</sup> mice. (A–C) Fold change of IL-4 (A), IL-17 (B), and IFN-γ (C) in supernatants of thymocytes stimulated for 4 d with α-GalCer (iNKT cell fold expansion of the same cultures is shown in Fig. 55E). Black bars, WT mice; white bars, CD4 Cre-Atg7<sup>-/-</sup> mice. Negative controls were CD1d<sup>-/-</sup> and Jα18<sup>-/-</sup> mice. Pooled data from two experiments; n = 4–5 mice/group. (D) Representative plots depicting intracellular staining with antibodies to T-bet and RORγt in two WT and two CD4 Cre-Atg7<sup>-/-</sup> mice.
